# Supplementary material for: Cerebrospinal fluid biomarkers reveal transdiagnostic synaptic dysfunction across major psychiatric disorders
Source: Research Square preprint supplement (doi:10.21203/rs.3.rs-7924300/v1), 2025-10-30
Supplement: Supplementary file 2 [file f29bf4ae69edfc3f2bf4d72f.xlsx]

## Sheet: Table 1
	ADHD	AN	BD1	BD2+	SCZ+	CON
n, T1	73	40	140	179	73	167
Age at CSF sampling, mean (sd)	35.1 (10.2)	27.3 (5.9)	39.6 (12.4)	38.7 (12.2)	35.7 (10.9)	39.5 (13.2)
Female sex, n (%)	34 (47%)	40 (100%)	74 (53%)	120 (67%)	24 (34%)	91 (54%)
Body mass index, mean (sd)	24.2 (4.5)	17.4 (1.7)	26.9 (5.0)	25.2 (4.7)	26.8 (4.1)	24.3 (3.7)
Diagnostic subtype	ADD (n=18, 25%); ADHD (n=52, 71%), ADHD unspecified (n=3, 4%)	Anorexia nervosa (n=40, 100%)	BD1 (n=140, 100%)	BD2 (n=157, 87%); BD not otherwise specified (n=10, 6%); cyclothymia (n=7, 4%); recurrent depression (n=5, 3%)	Schizophrenia (n=36, 49%), schizoaffective (n=11, 15%), substance-realated psychotic disroders (n=2, 3%), other primary psychotic disorders (n=24, 33%)	N/A
Years of illness, median (range)	21 (1-50)	10.5 (0-31)	16 (0-50)	16 (0-52)	7 (0-36)	N/A
Number of hospitalizations, mean (sd)	0 (0, 1)	N/A*	2 (1, 4)	1 (0, 2)	1 (1, 2)	N/A
Lifetime psychotic experience, n (%)	3 (4.2%)	N/A*	117 (84%)	34 (19%)	73 (100%)
Comorbid substance abuse, n (%)	4 (5.6%)	N/A*	13 (9.3%)	16 (8.9%)	12 (17%)	N/A
Current medication at CSF sampling, n (%)		N/A*				N/A
Antidepressants	22 (31%)		44 (31%)	105 (59%)	21 (30%)
Antiepileptic mood stabilizers	1 (1.4%)		46 (33%)	87 (49%)	2 (2.9%)
Central stimulants	57 (79%)		8 (5.7%)	16 (8.9%)	0 (0%)
First-generation antipsychotics	0 (0%)		10 (7.1%)	3 (1.7%)	3 (4.3%)
Lithium	0 (0%)		102 (73%)	79 (44%)	10 (14%)
Second-generation antipsychotics	4 (5.6%)		55 (39%)	32 (18%)	54 (77%)
*Data was not systematically collected
