# Supplementary material for: Cerebrospinal fluid biomarkers reveal transdiagnostic synaptic dysfunction across major psychiatric disorders
Source: Research Square preprint supplement (doi:10.21203/rs.3.rs-7924300/v1), 2025-10-30
Supplement: Supplementary file 3 [file f42bc2aec7fb963cf134855f.xlsx]

## Sheet: Table S1
Panel	Protein	Description	Sequence	Internal standard [fmol/µL]	Repeatability (%CV*)	Intermediate precision (%CV*)	Comment
Panel 1	CTSD	Cathepsin D	LSPEDYTLK	1.5	1.5	2.8
Panel 1	LAMP1	Lysosome-associated membrane glycoprotein 1	ALQATVGNSYK	1.4	1.4	3.3
Panel 1	VGF	Neurosecretory protein VGF	AYQGVAAPFPK	1.6	1.6	4.1
Panel 1	SCG2	Secretogranin-2	VLEYLNQEK	1.3	1.3	4.4
Panel 1	AP2B1	AP-2 complex subunit beta	AVWLPAVK	2.4	2.4	4.6
Panel 1	CPLX2	Complexin-2	MLGGEEEKDPDAQK	2.6	2.6	4.5
Panel 1	NPTX1	Neuronal pentraxin-1	LTPGEVYNLATCSTK	4.5	4.5	7.9
Panel 1	GRIA4	Glutamate receptor 4	IQGLTGNVQFDHYGR	5.2	5.2	9.9
Panel 1	CNTN2	Contactin-2	VISDTEADIGSNLR	2.2	2.2	4.1
Panel 1	CSTN1	Calsyntenin-1	GNLAGLTLR	3	3	6.3
Panel 1	THY1	Thy-1 membrane glycoprotein	VLYLSAFTSK	2.8	2.8	5.7
Panel 1	APP	Amyloid-beta precursor protein	VESLEQEAANER	6.8	6.8	11.8
Panel 1	NCAM2	Neural cell adhesion molecule 2	LTIYNANIEDAGIYR	5.6	5.6	12.1
Panel 1	CSTN3	Calsyntenin-3	GHQPPPEMAGHSLASSHR	6.1	6.1	9.1
Panel 1	CNTN1	Contactin-1	FIPLIPIPER	3	3	4.5
Panel 1	SYN1	Synapsin-1	GSHGQTPSPGALPLGR	14.2	14.2	20.9
Panel 1	NSF	Vesicle-fusing ATPase	AENSSLNLIGK	7.6	7.6	15.4
Panel 1	CPLX1	Complexin-1	MLGGDEEKDPDAAK	5.1	5.1	7.6
Panel 1	NPTX2	Neuronal pentraxin-2	VAELEDEK	2.3	2.3	4.7
Panel 1	NPTXR	Neuronal pentraxin receptor	NNYMYAR	2.1	2.1	3.6
Panel 1	1433Z	14-3-3 protein zeta/delta	VVSSIEQK	1.8	1.8	3
Panel 1	STX7	Syntaxin-7	EFGSLPTTPSEQR	6.3	6.3	9.6
Panel 1	VAMP2	Vesicle-associated membrane protein 2	SATAATAPPAAPAGEGGPPAPPPNLTSNR	9.5	9.5	19.6
Panel 1	GDIA	Rab GDP dissociation inhibitor alpha	QLICDPSYIPDR	4.8	4.8	8.5
Panel 1	STX1B	Syntaxin-1B	QHSAILAAPNPDEK	5	5	9.3
Panel 1	NEUG	Neurogranin	KGPGPGGPGGAGVAR	3.3	3.3	6.7
Panel 1	SYUB	Beta-synuclein	EGVVQGVASVAEK	5.7	5.7	12.5
Panel 1	KCC2A	Calcium/calmodulin-dependent protein kinase type II subunit alpha	ITQYLDAGGIPR	7.4	7.4	13.2
Panel 2	NRX1A	Neurexin-1 α	LTVDDQQAMTGQMAGDHTR	6	6	10
Panel 2	NRX2A	Neurexin-2 α	LGERPPALLGSQGLR	3.3	3.3	5.1
Panel 2	NRX3A	Neurexin-3 α	ANDGEWYHVDIQR	10.8	10.8	20.6
Panel 2	NLGN1	Neuroligin-1	LDDVDPLVATNFGK	2.4	2.4	5.1
Panel 2	NLGN2	Neuroligin-2	ELVDQDVQPAR	5	5	12
Panel 2	NLGN3	Neurologin-3	VGCNVLDTVDMVDCLR	5.7	5.7	10.9
Panel 2	NLGNX	Neuroligin-4	TGPEDTTVLIETK	5.4	5.4	8.6	Common peptides for the two NLGN4 isoforms
*CV coefficient of variation

## Sheet: Table S2
Table S2A. LC-MS/MS settings for the analysis of panel 1.
	Parameter	Setting
LC	Sample injection volume	40 µL
	Flow-rate	0.3 mL/min
	Gradient	Linear; 5–32%B (42.4 min)
	Total cycle time	45 min
	Mobile phase A	0.1% formic acid in water (v/v)
	Mobile phase B	0.1% formic acid/84% acetonitrile in water (v/v/v)
Electrospray	Mode	Positive
	Gas temperature	220 °C
	Gas flow	15 L/min
	Nebulizer pressure	40 psi
	Sheath gas temperature	200 °C
	Sheath gas flow	11 L/min
	Capillary voltage	3500 V
	Nozzle voltage	500 V
iFunnel	Mode	Positive
	High-pressure radio frequency	200 V
	Low-pressure radio frequency	160 V
MRM method	Retention time window	0.8 min
	Collision energies	Individually optimized per transition
	Cell accelerator voltage	Individually optimized per transition
Table S2B. LC-MS/MS settings for the analysis of panel 2.
	Parameter	Setting
LC	Sample injection volume	45 µL
	Flow-rate	0.3 mL/min
	Gradient	Linear; 0–32%B (24 min)
	Total cycle time	32 min
	Mobile phase A	0.1% formic acid in water (v/v)
	Mobile phase B	0.1% formic acid/84% acetonitrile in water (v/v/v)
LC column	Hypersil Gold reversed-phase column	Particle size 1.9 mm
		Length 100 mm
Electrospray	Source type	HESI II
	Mode	Positive
	Capillary temperature	320 °C
	Probe heater temperature	300 °C
	Sheath gas flow	25
	Aux gas flow	10
	Spray voltage	4100 V
PRM method	Retention time window	2 min
	Collision energies	Individually optimized per transition
Table S2C. LC-MS/MS settings for the analysis of SNAP-25 and synaptotagmin-1.
	Parameter	Setting
LC	Sample injection volume	40 µL
	Flow-rate	0.3 mL/min
	Gradient	Broken; 0–16%B (0.1 min), 16–19%B (11 min), 19–100%B (0.4 min)
	Total cycle time	12.5 min
	Mobile phase A	0.1% formic acid in water (v/v)
	Mobile phase B	0.1% formic acid/84% acetonitrile in water (v/v)
Electrospray	Mode	Positive
	Gas temperature	220 °C
	Gas flow	15 L/min
	Nebulizer pressure	30 psi
	Sheath gas temperature	200 °C
	Sheath gas flow	11 L/min
	Capillary voltage	4000 V
	Nozzle voltage	300 V
iFunnel	Mode	Positive
	High-pressure radio frequency	120 V
	Low-pressure radio frequency	100 V
MRM method	Retention time window	1 min
	Collision energies	Individually optimized per transition
	Cell accelerator voltage	2 V

## Sheet: Table S3
		Raw CSF concentrations							Adjusted for the non-disease covariance reference
Protein	Contrast	Beta	Std.error	95% CI lower	95% CI higher	t-statistic	p-value	FDR	Beta	Std.error	95% CI lower	95% CI higher	t-statistic	p-value	FDR
1433Z	ADHD - CON	-0.365	0.124	-0.609	-0.122	-2.937	0.004	0.018	-0.354	0.133	-0.615	-0.094	-2.666	0.008	0.019
1433Z	AN - CON	-0.148	0.192	-0.525	0.229	-0.769	0.444	0.836	-0.576	0.186	-0.941	-0.210	-3.089	0.003	0.038
1433Z	BD1 - CON	-0.249	0.107	-0.459	-0.038	-2.317	0.021	0.035	-0.137	0.124	-0.379	0.105	-1.109	0.268	0.327
1433Z	BD2+ - CON	-0.012	0.100	-0.209	0.184	-0.125	0.901	0.919	-0.145	0.111	-0.362	0.073	-1.300	0.194	0.249
1433Z	SCZ+ - CON	-0.289	0.138	-0.560	-0.019	-2.099	0.037	0.046	0.045	0.161	-0.271	0.361	0.281	0.779	0.795
AP2B1	ADHD - CON	-0.389	0.147	-0.676	-0.101	-2.649	0.009	0.025	-0.514	0.122	-0.753	-0.276	-4.226	3.45e-05	2.61e-04
AP2B1	AN - CON	0.047	0.229	-0.402	0.496	0.205	0.838	0.992	-0.414	0.169	-0.745	-0.083	-2.449	0.016	0.090
AP2B1	BD1 - CON	-0.246	0.117	-0.477	-0.016	-2.098	0.037	0.057	-0.123	0.103	-0.325	0.079	-1.197	0.232	0.290
AP2B1	BD2+ - CON	-0.041	0.113	-0.262	0.181	-0.359	0.720	0.837	-0.317	0.088	-0.489	-0.145	-3.611	3.52e-04	0.001
AP2B1	SCZ+ - CON	-0.755	0.146	-1.040	-0.469	-5.183	4.85e-07	4.04e-06	-1.026	0.131	-1.282	-0.770	-7.858	1.59e-13	2.66e-12
APP	ADHD - CON	-0.294	0.135	-0.558	-0.030	-2.185	0.030	0.057	-0.230	0.128	-0.480	0.021	-1.795	0.074	0.109
APP	AN - CON	0.349	0.208	-0.058	0.757	1.682	0.095	0.581	0.302	0.191	-0.072	0.676	1.585	0.116	0.270
APP	BD1 - CON	-0.553	0.114	-0.777	-0.329	-4.846	2.04e-06	2.04e-05	-0.621	0.114	-0.845	-0.397	-5.437	1.14e-07	8.16e-07
APP	BD2+ - CON	-0.248	0.107	-0.458	-0.038	-2.319	0.021	0.098	-0.474	0.102	-0.674	-0.273	-4.626	5.36e-06	3.83e-05
APP	SCZ+ - CON	-0.560	0.136	-0.826	-0.293	-4.117	5.38e-05	1.79e-04	-0.440	0.131	-0.696	-0.183	-3.362	9.10e-04	0.003
CNTN1	ADHD - CON	-0.439	0.130	-0.694	-0.185	-3.385	8.40e-04	0.006	-0.532	0.140	-0.806	-0.258	-3.805	1.83e-04	0.001
CNTN1	AN - CON	0.003	0.202	-0.393	0.399	0.016	0.987	0.992	-0.360	0.205	-0.763	0.042	-1.757	0.081	0.200
CNTN1	BD1 - CON	-0.314	0.110	-0.529	-0.099	-2.863	0.005	0.009	-0.270	0.118	-0.501	-0.039	-2.292	0.023	0.042
CNTN1	BD2+ - CON	-0.063	0.102	-0.263	0.137	-0.621	0.535	0.743	-0.270	0.104	-0.475	-0.066	-2.589	0.010	0.021
CNTN1	SCZ+ - CON	-0.334	0.127	-0.583	-0.085	-2.627	0.009	0.014	-0.012	0.145	-0.297	0.272	-0.085	0.932	0.932
CNTN2	ADHD - CON	-0.415	0.130	-0.670	-0.160	-3.191	0.002	0.009	-0.388	0.133	-0.649	-0.126	-2.909	0.004	0.012
CNTN2	AN - CON	0.225	0.197	-0.161	0.610	1.141	0.256	0.787	0.108	0.205	-0.294	0.510	0.527	0.599	0.762
CNTN2	BD1 - CON	-0.276	0.107	-0.486	-0.065	-2.571	0.011	0.019	-0.185	0.108	-0.397	0.027	-1.707	0.089	0.135
CNTN2	BD2+ - CON	-0.071	0.103	-0.273	0.131	-0.690	0.491	0.743	-0.182	0.105	-0.387	0.024	-1.735	0.084	0.127
CNTN2	SCZ+ - CON	-0.239	0.127	-0.489	0.010	-1.881	0.061	0.071	0.037	0.130	-0.219	0.292	0.281	0.779	0.795
CPLX1	ADHD - CON	-0.350	0.134	-0.613	-0.087	-2.607	0.010	0.026	-0.429	0.128	-0.680	-0.179	-3.361	9.11e-04	0.004
CPLX1	AN - CON	-0.002	0.215	-0.424	0.420	-0.010	0.992	0.992	-0.484	0.184	-0.845	-0.122	-2.623	0.010	0.080
CPLX1	BD1 - CON	-0.230	0.111	-0.447	-0.013	-2.078	0.039	0.058	-0.112	0.113	-0.334	0.109	-0.993	0.321	0.358
CPLX1	BD2+ - CON	-0.025	0.107	-0.236	0.185	-0.236	0.814	0.888	-0.251	0.096	-0.438	-0.063	-2.622	0.009	0.021
CPLX1	SCZ+ - CON	-0.490	0.138	-0.760	-0.220	-3.560	4.52e-04	9.82e-04	-0.377	0.134	-0.639	-0.115	-2.820	0.005	0.011
CPLX2	ADHD - CON	-0.358	0.145	-0.642	-0.075	-2.476	0.014	0.035	-0.376	0.133	-0.636	-0.117	-2.838	0.005	0.013
CPLX2	AN - CON	-0.051	0.243	-0.526	0.424	-0.210	0.834	0.992	-0.565	0.199	-0.955	-0.175	-2.839	0.005	0.052
CPLX2	BD1 - CON	-0.221	0.125	-0.467	0.025	-1.762	0.079	0.101	-0.055	0.122	-0.295	0.185	-0.450	0.653	0.653
CPLX2	BD2+ - CON	0.026	0.116	-0.202	0.253	0.220	0.826	0.888	-0.119	0.103	-0.321	0.083	-1.157	0.248	0.298
CPLX2	SCZ+ - CON	-0.523	0.150	-0.817	-0.229	-3.488	5.85e-04	0.001	-0.364	0.142	-0.643	-0.086	-2.566	0.011	0.022
CSTN1	ADHD - CON	-0.552	0.152	-0.850	-0.254	-3.627	3.54e-04	0.005	-0.733	0.132	-0.993	-0.474	-5.539	8.43e-08	2.11e-06
CSTN1	AN - CON	0.018	0.240	-0.452	0.489	0.076	0.940	0.992	-0.366	0.205	-0.768	0.036	-1.783	0.077	0.200
CSTN1	BD1 - CON	-0.587	0.127	-0.835	-0.339	-4.633	5.43e-06	3.70e-05	-0.792	0.112	-1.012	-0.572	-7.052	1.27e-11	2.11e-10
CSTN1	BD2+ - CON	-0.191	0.119	-0.424	0.041	-1.611	0.108	0.259	-0.544	0.101	-0.742	-0.345	-5.364	1.53e-07	1.91e-06
CSTN1	SCZ+ - CON	-0.836	0.148	-1.127	-0.545	-5.628	5.38e-08	6.73e-07	-0.965	0.138	-1.236	-0.695	-7.001	2.86e-11	3.58e-10
CSTN3	ADHD - CON	-0.417	0.151	-0.713	-0.120	-2.750	0.006	0.021	-0.375	0.128	-0.626	-0.123	-2.920	0.004	0.012
CSTN3	AN - CON	-0.063	0.232	-0.518	0.392	-0.272	0.786	0.992	-0.402	0.191	-0.776	-0.027	-2.102	0.038	0.142
CSTN3	BD1 - CON	-0.484	0.124	-0.727	-0.241	-3.903	1.18e-04	3.27e-04	-0.473	0.105	-0.678	-0.267	-4.516	9.13e-06	3.26e-05
CSTN3	BD2+ - CON	-0.087	0.120	-0.322	0.148	-0.725	0.469	0.732	-0.256	0.094	-0.440	-0.072	-2.724	0.007	0.016
CSTN3	SCZ+ - CON	-0.697	0.151	-0.993	-0.401	-4.618	6.50e-06	4.06e-05	-0.565	0.130	-0.819	-0.310	-4.346	2.10e-05	1.05e-04
CTSD	ADHD - CON	-0.816	0.134	-1.079	-0.553	-6.075	5.21e-09	2.61e-07	-0.785	0.138	-1.055	-0.515	-5.695	3.82e-08	1.91e-06
CTSD	AN - CON	-0.350	0.203	-0.748	0.049	-1.721	0.088	0.581	-0.492	0.202	-0.889	-0.095	-2.430	0.017	0.090
CTSD	BD1 - CON	-0.191	0.151	-0.486	0.105	-1.262	0.208	0.231	-0.100	0.151	-0.396	0.196	-0.660	0.510	0.531
CTSD	BD2+ - CON	-0.109	0.119	-0.343	0.126	-0.908	0.364	0.634	-0.162	0.121	-0.398	0.075	-1.339	0.182	0.239
CTSD	SCZ+ - CON	-0.586	0.140	-0.861	-0.311	-4.171	4.32e-05	1.54e-04	-0.441	0.148	-0.732	-0.150	-2.972	0.003	0.007
GDIA	ADHD - CON	-0.291	0.133	-0.551	-0.031	-2.192	0.029	0.057	-0.234	0.128	-0.485	0.017	-1.825	0.069	0.105
GDIA	AN - CON	0.183	0.215	-0.237	0.604	0.854	0.395	0.787	-0.024	0.179	-0.376	0.327	-0.137	0.892	0.910
GDIA	BD1 - CON	-0.142	0.110	-0.357	0.073	-1.295	0.196	0.223	0.105	0.101	-0.093	0.303	1.039	0.300	0.357
GDIA	BD2+ - CON	0.140	0.106	-0.069	0.349	1.316	0.189	0.411	0.140	0.101	-0.058	0.339	1.388	0.166	0.224
GDIA	SCZ+ - CON	-0.319	0.138	-0.590	-0.048	-2.304	0.022	0.029	0.065	0.138	-0.206	0.335	0.470	0.639	0.720
GRIA4	ADHD - CON	-0.366	0.140	-0.640	-0.092	-2.616	0.009	0.026	-0.330	0.148	-0.620	-0.040	-2.227	0.027	0.048
GRIA4	AN - CON	0.242	0.216	-0.181	0.665	1.122	0.264	0.787	0.109	0.212	-0.305	0.524	0.516	0.607	0.762
GRIA4	BD1 - CON	-0.433	0.122	-0.672	-0.195	-3.566	4.23e-04	0.001	-0.432	0.126	-0.679	-0.186	-3.442	6.61e-04	0.002
GRIA4	BD2+ - CON	-0.238	0.111	-0.455	-0.020	-2.141	0.033	0.118	-0.508	0.109	-0.720	-0.295	-4.671	4.36e-06	3.63e-05
GRIA4	SCZ+ - CON	-0.883	0.140	-1.157	-0.610	-6.328	1.32e-09	3.30e-08	-0.940	0.153	-1.239	-0.640	-6.149	3.49e-09	2.91e-08
KCC2A	ADHD - CON	-0.254	0.140	-0.528	0.021	-1.810	0.072	0.112	-0.172	0.126	-0.419	0.075	-1.367	0.173	0.222
KCC2A	AN - CON	0.205	0.204	-0.194	0.604	1.009	0.315	0.787	0.078	0.182	-0.278	0.434	0.430	0.668	0.780
KCC2A	BD1 - CON	-0.469	0.116	-0.696	-0.241	-4.042	6.77e-05	2.15e-04	-0.523	0.112	-0.742	-0.303	-4.667	4.65e-06	1.94e-05
KCC2A	BD2+ - CON	-0.276	0.109	-0.489	-0.063	-2.539	0.012	0.097	-0.564	0.102	-0.763	-0.365	-5.551	5.83e-08	9.71e-07
KCC2A	SCZ+ - CON	-0.606	0.144	-0.888	-0.323	-4.203	3.80e-05	1.46e-04	-0.535	0.138	-0.806	-0.264	-3.873	1.41e-04	5.57e-04
LAMP1	ADHD - CON	-0.432	0.125	-0.676	-0.188	-3.465	6.33e-04	0.005	-0.443	0.135	-0.707	-0.179	-3.291	0.001	0.004
LAMP1	AN - CON	0.107	0.197	-0.279	0.492	0.541	0.589	0.963	-0.092	0.201	-0.486	0.301	-0.460	0.647	0.774
LAMP1	BD1 - CON	-0.220	0.108	-0.431	-0.009	-2.045	0.042	0.060	-0.096	0.111	-0.313	0.122	-0.863	0.389	0.422
LAMP1	BD2+ - CON	-0.076	0.097	-0.266	0.115	-0.777	0.438	0.730	-0.224	0.100	-0.420	-0.028	-2.239	0.026	0.048
LAMP1	SCZ+ - CON	-0.319	0.121	-0.556	-0.081	-2.630	0.009	0.014	-0.039	0.133	-0.300	0.222	-0.293	0.770	0.795
NCAM2	ADHD - CON	-0.238	0.126	-0.485	0.009	-1.886	0.061	0.098	-0.163	0.126	-0.410	0.084	-1.291	0.198	0.247
NCAM2	AN - CON	0.157	0.187	-0.209	0.523	0.842	0.402	0.787	-0.085	0.154	-0.387	0.218	-0.549	0.584	0.762
NCAM2	BD1 - CON	-0.280	0.108	-0.491	-0.069	-2.596	0.010	0.018	-0.262	0.106	-0.470	-0.054	-2.473	0.014	0.027
NCAM2	BD2+ - CON	-0.019	0.099	-0.213	0.174	-0.198	0.843	0.888	-0.255	0.091	-0.434	-0.076	-2.798	0.005	0.014
NCAM2	SCZ+ - CON	-0.382	0.128	-0.633	-0.131	-2.984	0.003	0.005	-0.125	0.121	-0.361	0.112	-1.033	0.303	0.369
NEUG	ADHD - CON	-0.305	0.148	-0.594	-0.015	-2.064	0.040	0.069	-0.236	0.109	-0.450	-0.022	-2.157	0.032	0.053
NEUG	AN - CON	0.079	0.228	-0.368	0.526	0.348	0.728	0.991	-0.155	0.164	-0.477	0.168	-0.940	0.349	0.534
NEUG	BD1 - CON	-0.272	0.117	-0.500	-0.043	-2.328	0.021	0.035	-0.172	0.088	-0.345	9.80e-04	-1.949	0.052	0.082
NEUG	BD2+ - CON	-0.021	0.112	-0.240	0.198	-0.186	0.852	0.888	-0.147	0.082	-0.308	0.014	-1.787	0.075	0.118
NEUG	SCZ+ - CON	-0.593	0.149	-0.886	-0.301	-3.981	9.27e-05	2.73e-04	-0.474	0.117	-0.704	-0.244	-4.038	7.39e-05	3.36e-04
NLGN1	ADHD - CON	-0.458	0.132	-0.717	-0.199	-3.461	6.44e-04	0.005	-0.496	0.146	-0.782	-0.210	-3.396	8.08e-04	0.004
NLGN1	AN - CON	-0.091	0.217	-0.517	0.334	-0.421	0.674	0.991	-0.371	0.201	-0.766	0.024	-1.842	0.068	0.196
NLGN1	BD1 - CON	-0.611	0.121	-0.848	-0.374	-5.052	7.71e-07	1.28e-05	-0.678	0.131	-0.935	-0.421	-5.177	4.20e-07	2.62e-06
NLGN1	BD2+ - CON	-0.262	0.114	-0.486	-0.038	-2.295	0.022	0.098	-0.507	0.126	-0.754	-0.260	-4.027	7.02e-05	2.93e-04
NLGN1	SCZ+ - CON	-0.467	0.141	-0.744	-0.191	-3.312	0.001	0.002	-0.238	0.151	-0.534	0.059	-1.571	0.118	0.163
NLGN2	ADHD - CON	-0.379	0.132	-0.638	-0.120	-2.864	0.005	0.018	-0.371	0.148	-0.660	-0.082	-2.513	0.013	0.028
NLGN2	AN - CON	0.086	0.217	-0.341	0.512	0.394	0.695	0.991	-0.092	0.201	-0.486	0.302	-0.459	0.647	0.774
NLGN2	BD1 - CON	-0.567	0.121	-0.804	-0.330	-4.694	4.13e-06	3.44e-05	-0.607	0.133	-0.868	-0.346	-4.566	7.35e-06	2.83e-05
NLGN2	BD2+ - CON	-0.245	0.110	-0.460	-0.029	-2.226	0.027	0.103	-0.471	0.120	-0.706	-0.236	-3.922	1.07e-04	4.11e-04
NLGN2	SCZ+ - CON	-0.533	0.141	-0.810	-0.256	-3.774	2.05e-04	5.13e-04	-0.339	0.156	-0.645	-0.033	-2.171	0.031	0.056
NLGN3	ADHD - CON	-0.228	0.131	-0.484	0.028	-1.748	0.082	0.117	-0.136	0.142	-0.414	0.142	-0.958	0.339	0.385
NLGN3	AN - CON	0.028	0.214	-0.391	0.446	0.130	0.897	0.992	-0.150	0.192	-0.526	0.227	-0.779	0.437	0.649
NLGN3	BD1 - CON	-0.536	0.118	-0.767	-0.305	-4.552	7.86e-06	4.37e-05	-0.553	0.126	-0.801	-0.305	-4.375	1.70e-05	5.67e-05
NLGN3	BD2+ - CON	-0.147	0.110	-0.363	0.070	-1.330	0.185	0.411	-0.294	0.119	-0.527	-0.060	-2.468	0.014	0.027
NLGN3	SCZ+ - CON	-0.328	0.137	-0.596	-0.059	-2.392	0.018	0.024	-0.066	0.145	-0.350	0.218	-0.457	0.648	0.720
NLGNX	ADHD - CON	-0.272	0.133	-0.532	-0.012	-2.050	0.041	0.069	-0.194	0.129	-0.446	0.058	-1.505	0.134	0.186
NLGNX	AN - CON	-0.299	0.221	-0.732	0.133	-1.356	0.178	0.726	-0.692	0.195	-1.074	-0.310	-3.551	5.53e-04	0.027
NLGNX	BD1 - CON	-0.455	0.113	-0.676	-0.234	-4.039	6.88e-05	2.15e-04	-0.431	0.110	-0.647	-0.215	-3.909	1.15e-04	3.03e-04
NLGNX	BD2+ - CON	-0.065	0.109	-0.280	0.149	-0.598	0.550	0.744	-0.190	0.107	-0.400	0.019	-1.783	0.076	0.118
NLGNX	SCZ+ - CON	-0.432	0.141	-0.709	-0.155	-3.059	0.002	0.004	-0.182	0.143	-0.462	0.099	-1.267	0.207	0.258
NPTX1	ADHD - CON	-0.459	0.142	-0.738	-0.180	-3.227	0.001	0.009	-0.440	0.133	-0.701	-0.180	-3.312	0.001	0.004
NPTX1	AN - CON	0.027	0.226	-0.416	0.470	0.121	0.904	0.992	-0.245	0.209	-0.654	0.165	-1.171	0.244	0.413
NPTX1	BD1 - CON	-0.534	0.123	-0.775	-0.293	-4.340	1.96e-05	8.91e-05	-0.547	0.113	-0.768	-0.325	-4.840	2.10e-06	1.05e-05
NPTX1	BD2+ - CON	-0.252	0.120	-0.487	-0.017	-2.100	0.036	0.122	-0.502	0.110	-0.717	-0.287	-4.579	6.63e-06	4.15e-05
NPTX1	SCZ+ - CON	-0.783	0.146	-1.068	-0.497	-5.378	1.88e-07	1.88e-06	-0.701	0.142	-0.978	-0.423	-4.946	1.48e-06	9.26e-06
NPTX2	ADHD - CON	-0.530	0.149	-0.823	-0.238	-3.556	4.58e-04	0.005	-0.542	0.127	-0.790	-0.293	-4.272	2.85e-05	2.61e-04
NPTX2	AN - CON	0.209	0.223	-0.229	0.646	0.935	0.351	0.787	0.067	0.165	-0.257	0.391	0.405	0.686	0.782
NPTX2	BD1 - CON	-0.736	0.123	-0.977	-0.495	-5.978	6.52e-09	3.26e-07	-0.830	0.110	-1.046	-0.614	-7.538	5.95e-13	2.97e-11
NPTX2	BD2+ - CON	-0.394	0.115	-0.618	-0.169	-3.434	6.71e-04	0.017	-0.657	0.095	-0.843	-0.471	-6.920	2.35e-11	5.88e-10
NPTX2	SCZ+ - CON	-1.040	0.141	-1.317	-0.764	-7.385	2.90e-12	1.45e-10	-1.078	0.122	-1.318	-0.838	-8.803	3.53e-16	1.76e-14
NPTXR	ADHD - CON	-0.400	0.149	-0.692	-0.109	-2.690	0.008	0.024	-0.454	0.125	-0.699	-0.209	-3.632	3.48e-04	0.002
NPTXR	AN - CON	0.222	0.229	-0.227	0.671	0.969	0.335	0.787	0.063	0.170	-0.270	0.397	0.371	0.711	0.792
NPTXR	BD1 - CON	-0.556	0.123	-0.798	-0.315	-4.508	9.44e-06	4.72e-05	-0.766	0.108	-0.977	-0.555	-7.113	8.68e-12	2.11e-10
NPTXR	BD2+ - CON	-0.281	0.116	-0.508	-0.054	-2.421	0.016	0.098	-0.738	0.096	-0.926	-0.550	-7.701	1.58e-13	7.88e-12
NPTXR	SCZ+ - CON	-0.851	0.146	-1.138	-0.564	-5.811	2.10e-08	3.50e-07	-1.052	0.127	-1.301	-0.804	-8.295	9.81e-15	2.45e-13
NRX1A	ADHD - CON	-0.324	0.132	-0.584	-0.065	-2.449	0.015	0.036	-0.274	0.133	-0.536	-0.013	-2.055	0.041	0.066
NRX1A	AN - CON	0.017	0.216	-0.406	0.441	0.080	0.936	0.992	-0.194	0.166	-0.519	0.130	-1.174	0.243	0.413
NRX1A	BD1 - CON	-0.602	0.119	-0.835	-0.369	-5.069	7.13e-07	1.28e-05	-0.647	0.115	-0.873	-0.422	-5.621	4.44e-08	3.70e-07
NRX1A	BD2+ - CON	-0.207	0.111	-0.425	0.010	-1.866	0.063	0.166	-0.409	0.107	-0.619	-0.198	-3.808	1.67e-04	5.95e-04
NRX1A	SCZ+ - CON	-0.618	0.143	-0.898	-0.339	-4.334	2.21e-05	1.00e-04	-0.468	0.140	-0.743	-0.194	-3.349	9.51e-04	0.003
NRX2A	ADHD - CON	-0.387	0.134	-0.649	-0.124	-2.889	0.004	0.018	-0.365	0.151	-0.660	-0.069	-2.419	0.016	0.034
NRX2A	AN - CON	-0.035	0.220	-0.466	0.397	-0.157	0.875	0.992	-0.272	0.199	-0.661	0.118	-1.368	0.174	0.355
NRX2A	BD1 - CON	-0.621	0.125	-0.865	-0.377	-4.986	1.06e-06	1.32e-05	-0.667	0.133	-0.927	-0.408	-5.036	8.32e-07	4.62e-06
NRX2A	BD2+ - CON	-0.286	0.118	-0.516	-0.055	-2.427	0.016	0.098	-0.525	0.126	-0.773	-0.277	-4.155	4.15e-05	2.07e-04
NRX2A	SCZ+ - CON	-0.639	0.144	-0.921	-0.358	-4.453	1.33e-05	6.80e-05	-0.497	0.157	-0.805	-0.189	-3.159	0.002	0.005
NRX3A	ADHD - CON	-0.094	0.142	-0.372	0.184	-0.662	0.509	0.591	0.035	0.148	-0.256	0.326	0.238	0.812	0.846
NRX3A	AN - CON	0.284	0.218	-0.143	0.711	1.305	0.194	0.733	0.238	0.195	-0.145	0.621	1.219	0.225	0.413
NRX3A	BD1 - CON	-0.481	0.113	-0.703	-0.259	-4.243	2.96e-05	1.23e-04	-0.472	0.118	-0.704	-0.240	-3.986	8.51e-05	2.50e-04
NRX3A	BD2+ - CON	-0.220	0.115	-0.445	0.005	-1.917	0.056	0.156	-0.373	0.116	-0.599	-0.146	-3.222	0.001	0.004
NRX3A	SCZ+ - CON	-0.597	0.147	-0.885	-0.308	-4.057	6.84e-05	2.14e-04	-0.483	0.153	-0.783	-0.184	-3.163	0.002	0.005
NSF	ADHD - CON	-0.357	0.151	-0.653	-0.061	-2.367	0.019	0.041	-0.326	0.144	-0.607	-0.044	-2.269	0.024	0.045
NSF	AN - CON	0.004	0.216	-0.420	0.428	0.018	0.986	0.992	-0.332	0.178	-0.680	0.016	-1.869	0.064	0.196
NSF	BD1 - CON	-0.125	0.121	-0.362	0.112	-1.033	0.303	0.322	0.105	0.106	-0.102	0.312	0.992	0.322	0.358
NSF	BD2+ - CON	0.082	0.110	-0.133	0.298	0.749	0.455	0.732	0.017	0.095	-0.169	0.203	0.175	0.861	0.897
NSF	SCZ+ - CON	-0.494	0.144	-0.776	-0.213	-3.438	6.97e-04	0.001	-0.288	0.133	-0.548	-0.027	-2.164	0.032	0.056
SCG2	ADHD - CON	-0.082	0.147	-0.371	0.206	-0.559	0.577	0.655	0.199	0.127	-0.051	0.448	1.561	0.120	0.171
SCG2	AN - CON	0.273	0.219	-0.157	0.702	1.245	0.216	0.754	0.206	0.175	-0.137	0.549	1.179	0.241	0.413
SCG2	BD1 - CON	-0.461	0.114	-0.684	-0.238	-4.059	6.33e-05	2.15e-04	-0.636	0.107	-0.845	-0.427	-5.970	6.82e-09	8.53e-08
SCG2	BD2+ - CON	-0.103	0.114	-0.325	0.120	-0.902	0.368	0.634	-0.387	0.107	-0.597	-0.178	-3.621	3.39e-04	0.001
SCG2	SCZ+ - CON	-0.610	0.143	-0.891	-0.329	-4.252	3.11e-05	1.29e-04	-0.640	0.131	-0.896	-0.384	-4.900	1.83e-06	1.02e-05
SNAP25	ADHD - CON	0.070	0.137	-0.199	0.339	0.510	0.611	0.679	0.364	0.134	0.102	0.627	2.725	0.007	0.017
SNAP25	AN - CON	0.182	0.213	-0.236	0.600	0.855	0.394	0.787	0.046	0.197	-0.340	0.432	0.234	0.816	0.850
SNAP25	BD1 - CON	-0.258	0.115	-0.483	-0.033	-2.247	0.025	0.041	-0.171	0.116	-0.398	0.057	-1.471	0.142	0.192
SNAP25	BD2+ - CON	-0.077	0.115	-0.302	0.149	-0.666	0.506	0.743	-0.253	0.122	-0.492	-0.014	-2.079	0.038	0.064
SNAP25	SCZ+ - CON	-0.420	0.141	-0.695	-0.144	-2.987	0.003	0.005	-0.219	0.138	-0.489	0.051	-1.587	0.114	0.163
STX1B	ADHD - CON	-0.282	0.137	-0.552	-0.013	-2.053	0.041	0.069	-0.255	0.140	-0.528	0.019	-1.825	0.069	0.105
STX1B	AN - CON	0.141	0.211	-0.273	0.554	0.667	0.506	0.919	-0.123	0.182	-0.480	0.234	-0.674	0.501	0.723
STX1B	BD1 - CON	-0.230	0.113	-0.451	-0.009	-2.040	0.042	0.060	-0.110	0.108	-0.322	0.102	-1.015	0.311	0.358
STX1B	BD2+ - CON	0.009	0.104	-0.195	0.213	0.087	0.931	0.931	-0.162	0.095	-0.348	0.023	-1.714	0.087	0.129
STX1B	SCZ+ - CON	-0.513	0.134	-0.775	-0.252	-3.844	1.57e-04	4.14e-04	-0.431	0.129	-0.684	-0.177	-3.333	0.001	0.003
STX7	ADHD - CON	-0.300	0.127	-0.548	-0.052	-2.371	0.019	0.041	-0.375	0.136	-0.643	-0.108	-2.754	0.006	0.016
STX7	AN - CON	0.092	0.192	-0.285	0.469	0.478	0.634	0.970	-0.303	0.172	-0.641	0.035	-1.758	0.081	0.200
STX7	BD1 - CON	-0.140	0.104	-0.344	0.064	-1.346	0.179	0.209	0.141	0.109	-0.073	0.354	1.293	0.197	0.252
STX7	BD2+ - CON	0.036	0.098	-0.156	0.229	0.367	0.714	0.837	-0.118	0.099	-0.311	0.075	-1.201	0.231	0.288
STX7	SCZ+ - CON	-0.380	0.128	-0.631	-0.128	-2.956	0.003	0.006	-0.125	0.142	-0.403	0.154	-0.878	0.381	0.453
SYN1	ADHD - CON	-0.343	0.149	-0.635	-0.051	-2.305	0.022	0.046	-0.291	0.134	-0.553	-0.029	-2.173	0.031	0.053
SYN1	AN - CON	0.080	0.227	-0.364	0.524	0.355	0.723	0.991	-0.173	0.179	-0.525	0.179	-0.965	0.336	0.532
SYN1	BD1 - CON	-0.079	0.119	-0.312	0.153	-0.670	0.504	0.525	0.168	0.104	-0.035	0.371	1.623	0.106	0.155
SYN1	BD2+ - CON	0.072	0.116	-0.154	0.299	0.625	0.532	0.743	0.002	0.096	-0.187	0.190	0.019	0.985	0.985
SYN1	SCZ+ - CON	-0.525	0.157	-0.831	-0.218	-3.350	9.48e-04	0.002	-0.337	0.173	-0.676	0.003	-1.942	0.053	0.083
SYT1	ADHD - CON	0.196	0.139	-0.076	0.469	1.414	0.159	0.220	0.676	0.133	0.414	0.937	5.068	8.45e-07	1.41e-05
SYT1	AN - CON	0.503	0.220	0.071	0.936	2.283	0.024	0.395	0.631	0.209	0.222	1.040	3.021	0.003	0.038
SYT1	BD1 - CON	-0.223	0.119	-0.456	0.009	-1.883	0.061	0.082	-0.106	0.126	-0.354	0.142	-0.839	0.402	0.428
SYT1	BD2+ - CON	0.045	0.118	-0.185	0.276	0.383	0.702	0.837	-0.062	0.131	-0.318	0.194	-0.474	0.636	0.691
SYT1	SCZ+ - CON	-0.552	0.142	-0.830	-0.274	-3.895	1.30e-04	3.60e-04	-0.445	0.138	-0.715	-0.176	-3.239	0.001	0.004
SYUB	ADHD - CON	0.004	0.139	-0.268	0.276	0.031	0.975	0.983	0.510	0.121	0.273	0.747	4.212	3.65e-05	2.61e-04
SYUB	AN - CON	0.317	0.217	-0.108	0.741	1.462	0.146	0.692	0.364	0.172	0.027	0.701	2.119	0.036	0.142
SYUB	BD1 - CON	-0.134	0.114	-0.356	0.089	-1.174	0.242	0.263	0.138	0.102	-0.061	0.338	1.362	0.174	0.229
SYUB	BD2+ - CON	0.204	0.106	-0.003	0.412	1.927	0.055	0.156	0.368	0.091	0.190	0.547	4.053	6.30e-05	2.86e-04
SYUB	SCZ+ - CON	-0.244	0.139	-0.517	0.029	-1.750	0.081	0.093	0.257	0.126	0.009	0.505	2.034	0.043	0.074
THY1	ADHD - CON	-0.406	0.140	-0.680	-0.133	-2.911	0.004	0.018	-0.599	0.136	-0.866	-0.333	-4.416	1.56e-05	1.95e-04
THY1	AN - CON	0.050	0.215	-0.371	0.471	0.234	0.816	0.992	-0.393	0.185	-0.756	-0.030	-2.122	0.036	0.142
THY1	BD1 - CON	-0.325	0.116	-0.552	-0.098	-2.808	0.005	0.010	-0.363	0.118	-0.594	-0.131	-3.072	0.002	0.005
THY1	BD2+ - CON	-0.121	0.109	-0.335	0.093	-1.107	0.269	0.517	-0.534	0.102	-0.734	-0.334	-5.241	2.85e-07	2.85e-06
THY1	SCZ+ - CON	-0.611	0.137	-0.880	-0.342	-4.449	1.36e-05	6.80e-05	-0.709	0.135	-0.973	-0.445	-5.255	3.43e-07	2.45e-06
VAMP2	ADHD - CON	-0.180	0.141	-0.455	0.095	-1.281	0.202	0.265	-0.043	0.118	-0.274	0.187	-0.367	0.714	0.760
VAMP2	AN - CON	0.184	0.211	-0.230	0.599	0.872	0.385	0.787	0.037	0.157	-0.270	0.345	0.238	0.813	0.850
VAMP2	BD1 - CON	-0.025	0.117	-0.255	0.204	-0.215	0.830	0.830	0.194	0.094	0.010	0.379	2.068	0.040	0.068
VAMP2	BD2+ - CON	0.045	0.107	-0.165	0.254	0.417	0.677	0.837	-0.027	0.088	-0.199	0.146	-0.301	0.763	0.812
VAMP2	SCZ+ - CON	-0.543	0.151	-0.838	-0.247	-3.602	3.89e-04	8.84e-04	-0.382	0.135	-0.648	-0.117	-2.823	0.005	0.011
VGF	ADHD - CON	-0.031	0.143	-0.311	0.249	-0.219	0.827	0.861	0.295	0.124	0.051	0.539	2.372	0.019	0.037
VGF	AN - CON	0.354	0.218	-0.073	0.781	1.626	0.107	0.581	0.388	0.180	0.036	0.741	2.158	0.033	0.142
VGF	BD1 - CON	-0.459	0.111	-0.677	-0.242	-4.141	4.53e-05	1.74e-04	-0.626	0.109	-0.840	-0.411	-5.719	2.63e-08	2.63e-07
VGF	BD2+ - CON	-0.136	0.110	-0.352	0.080	-1.231	0.219	0.457	-0.445	0.103	-0.647	-0.244	-4.335	1.94e-05	1.08e-04
VGF	SCZ+ - CON	-0.700	0.141	-0.977	-0.424	-4.966	1.35e-06	9.63e-06	-0.838	0.133	-1.098	-0.578	-6.313	1.43e-09	1.43e-08
									The reference was developed for synaptic proteins; results below are shown for transparency
C1q	ADHD - CON	-0.052	0.144	-0.334	0.231	-0.359	0.720	0.783	-0.005	0.149	-0.297	0.287	-0.034	0.973	0.973
C1q	AN - CON	-0.168	0.188	-0.536	0.200	-0.894	0.373	0.787	-0.224	0.190	-0.596	0.148	-1.181	0.240	0.413
C1q	BD1 - CON	0.183	0.108	-0.028	0.394	1.701	0.090	0.113	0.235	0.109	0.021	0.449	2.155	0.032	0.057
C1q	BD2+ - CON	0.196	0.102	-0.004	0.396	1.918	0.056	0.156	0.171	0.105	-0.036	0.377	1.622	0.106	0.151
C1q	SCZ+ - CON	-0.033	0.145	-0.318	0.252	-0.225	0.822	0.822	0.052	0.150	-0.242	0.346	0.346	0.730	0.793
C2	ADHD - CON	0.518	0.135	0.254	0.782	3.845	1.56e-04	0.004	0.574	0.140	0.300	0.849	4.100	5.75e-05	3.59e-04
C2	AN - CON	0.098	0.192	-0.278	0.474	0.511	0.610	0.965	0.058	0.196	-0.326	0.442	0.295	0.768	0.837
C2	BD1 - CON	0.030	0.108	-0.181	0.241	0.279	0.781	0.797	0.069	0.110	-0.147	0.286	0.626	0.532	0.543
C2	BD2+ - CON	-0.040	0.096	-0.229	0.149	-0.416	0.678	0.837	-0.066	0.099	-0.259	0.128	-0.664	0.507	0.577
C2	SCZ+ - CON	-0.302	0.141	-0.577	-0.027	-2.149	0.033	0.042	-0.253	0.143	-0.533	0.028	-1.764	0.079	0.120
C3	ADHD - CON	-0.282	0.131	-0.539	-0.024	-2.146	0.033	0.061	-0.306	0.133	-0.567	-0.045	-2.298	0.022	0.043
C3	AN - CON	-0.522	0.205	-0.923	-0.121	-2.552	0.012	0.292	-0.507	0.208	-0.914	-0.100	-2.444	0.016	0.090
C3	BD1 - CON	-0.326	0.106	-0.533	-0.119	-3.084	0.002	0.005	-0.346	0.107	-0.555	-0.137	-3.247	0.001	0.003
C3	BD2+ - CON	-0.393	0.101	-0.591	-0.194	-3.884	1.24e-04	0.006	-0.376	0.102	-0.575	-0.177	-3.698	2.55e-04	8.50e-04
C3	SCZ+ - CON	-0.551	0.151	-0.847	-0.255	-3.648	3.27e-04	7.79e-04	-0.592	0.153	-0.892	-0.292	-3.865	1.45e-04	5.57e-04
C3b/iC3b	ADHD - CON	0.039	0.120	-0.195	0.273	0.326	0.745	0.793	0.095	0.125	-0.150	0.339	0.760	0.448	0.498
C3b/iC3b	AN - CON	-0.284	0.167	-0.610	0.043	-1.701	0.092	0.581	-0.333	0.167	-0.661	-0.005	-1.990	0.049	0.159
C3b/iC3b	BD1 - CON	0.351	0.114	0.129	0.574	3.091	0.002	0.005	0.399	0.117	0.169	0.628	3.408	7.47e-04	0.002
C3b/iC3b	BD2+ - CON	0.171	0.106	-0.037	0.379	1.608	0.109	0.259	0.160	0.110	-0.056	0.377	1.453	0.147	0.204
C3b/iC3b	SCZ+ - CON	-0.316	0.132	-0.574	-0.058	-2.400	0.017	0.024	-0.266	0.136	-0.531	-1.74e-04	-1.961	0.051	0.082
C4	ADHD - CON	0.131	0.134	-0.131	0.393	0.980	0.328	0.417	0.134	0.135	-0.131	0.398	0.991	0.323	0.375
C4	AN - CON	-0.108	0.194	-0.489	0.273	-0.554	0.581	0.963	-0.114	0.194	-0.495	0.267	-0.587	0.558	0.759
C4	BD1 - CON	0.174	0.113	-0.046	0.395	1.549	0.123	0.146	0.180	0.113	-0.041	0.401	1.599	0.111	0.158
C4	BD2+ - CON	0.122	0.104	-0.081	0.326	1.177	0.240	0.480	0.112	0.104	-0.093	0.317	1.072	0.284	0.331
C4	SCZ+ - CON	-0.090	0.141	-0.366	0.187	-0.635	0.526	0.537	-0.094	0.142	-0.372	0.184	-0.662	0.509	0.592
C4b	ADHD - CON	0.100	0.134	-0.163	0.362	0.744	0.458	0.558	0.158	0.139	-0.114	0.430	1.138	0.256	0.307
C4b	AN - CON	-0.382	0.205	-0.783	0.019	-1.868	0.064	0.581	-0.431	0.212	-0.846	-0.016	-2.036	0.044	0.153
C4b	BD1 - CON	0.317	0.109	0.104	0.531	2.910	0.004	0.008	0.361	0.111	0.143	0.578	3.255	0.001	0.003
C4b	BD2+ - CON	0.239	0.105	0.033	0.444	2.276	0.023	0.098	0.222	0.107	0.013	0.431	2.077	0.039	0.064
C4b	SCZ+ - CON	0.145	0.145	-0.140	0.430	0.999	0.319	0.332	0.217	0.147	-0.071	0.504	1.479	0.141	0.190
C5	ADHD - CON	0.132	0.136	-0.135	0.399	0.969	0.334	0.417	0.158	0.140	-0.115	0.432	1.134	0.258	0.307
C5	AN - CON	-0.253	0.177	-0.600	0.094	-1.430	0.155	0.692	-0.271	0.179	-0.622	0.080	-1.513	0.133	0.296
C5	BD1 - CON	0.495	0.107	0.285	0.706	4.614	5.92e-06	3.70e-05	0.513	0.109	0.300	0.725	4.722	3.62e-06	1.64e-05
C5	BD2+ - CON	0.306	0.101	0.108	0.504	3.024	0.003	0.045	0.287	0.102	0.088	0.487	2.821	0.005	0.013
C5	SCZ+ - CON	0.271	0.141	-0.005	0.547	1.927	0.055	0.066	0.281	0.142	0.003	0.560	1.981	0.049	0.081
C5a	ADHD - CON	0.103	0.145	-0.180	0.386	0.712	0.477	0.568	0.098	0.145	-0.185	0.382	0.681	0.497	0.540
C5a	AN - CON	-0.591	0.187	-0.958	-0.224	-3.155	0.002	0.099	-0.584	0.186	-0.949	-0.218	-3.130	0.002	0.038
C5a	BD1 - CON	0.235	0.118	0.004	0.466	1.992	0.047	0.066	0.229	0.117	-0.002	0.459	1.947	0.053	0.082
C5a	BD2+ - CON	0.119	0.113	-0.102	0.340	1.058	0.291	0.538	0.128	0.111	-0.090	0.347	1.152	0.250	0.298
C5a	SCZ+ - CON	-0.379	0.140	-0.653	-0.105	-2.707	0.007	0.011	-0.428	0.138	-0.698	-0.158	-3.106	0.002	0.005
CFH	ADHD - CON	0.003	0.141	-0.274	0.280	0.021	0.983	0.983	0.014	0.142	-0.263	0.292	0.100	0.921	0.940
CFH	AN - CON	0.013	0.210	-0.399	0.425	0.062	0.951	0.992	0.015	0.210	-0.397	0.427	0.073	0.942	0.942
CFH	BD1 - CON	0.176	0.111	-0.040	0.393	1.594	0.112	0.137	0.174	0.111	-0.043	0.390	1.573	0.117	0.162
CFH	BD2+ - CON	-0.058	0.107	-0.267	0.150	-0.549	0.584	0.768	-0.054	0.107	-0.264	0.156	-0.506	0.613	0.681
CFH	SCZ+ - CON	-0.173	0.141	-0.450	0.104	-1.222	0.223	0.237	-0.183	0.142	-0.462	0.096	-1.283	0.201	0.257
CFI	ADHD - CON	0.376	0.137	0.109	0.644	2.755	0.006	0.021	0.391	0.138	0.121	0.660	2.840	0.005	0.013
CFI	AN - CON	-0.187	0.178	-0.535	0.161	-1.052	0.295	0.787	-0.191	0.178	-0.540	0.158	-1.074	0.285	0.466
CFI	BD1 - CON	0.431	0.109	0.217	0.645	3.945	1.00e-04	2.94e-04	0.434	0.109	0.220	0.649	3.969	9.09e-05	2.53e-04
CFI	BD2+ - CON	0.226	0.097	0.035	0.417	2.323	0.021	0.098	0.206	0.097	0.016	0.395	2.122	0.035	0.062
CFI	SCZ+ - CON	0.237	0.138	-0.033	0.507	1.718	0.087	0.097	0.221	0.138	-0.049	0.490	1.602	0.111	0.163
MBL	ADHD - CON	0.193	0.140	-0.081	0.467	1.381	0.169	0.228	0.198	0.140	-0.077	0.473	1.412	0.159	0.210
MBL	AN - CON	0.121	0.206	-0.282	0.524	0.589	0.557	0.963	0.128	0.205	-0.275	0.531	0.624	0.534	0.747
MBL	BD1 - CON	0.368	0.112	0.148	0.587	3.284	0.001	0.003	0.363	0.112	0.143	0.583	3.238	0.001	0.003
MBL	BD2+ - CON	0.288	0.105	0.082	0.494	2.745	0.006	0.064	0.268	0.104	0.064	0.473	2.579	0.010	0.021
MBL	SCZ+ - CON	0.360	0.153	0.061	0.659	2.357	0.019	0.026	0.335	0.154	0.034	0.636	2.181	0.030	0.056
NfL	ADHD - CON	0.148	0.084	-0.016	0.312	1.770	0.078	0.115	0.280	0.097	0.090	0.470	2.888	0.004	0.012
NfL	AN - CON	0.253	0.118	0.022	0.483	2.147	0.034	0.413	0.199	0.141	-0.077	0.475	1.410	0.161	0.343
NfL	BD1 - CON	0.252	0.078	0.100	0.404	3.249	0.001	0.003	0.395	0.093	0.212	0.577	4.232	3.08e-05	9.63e-05
NfL	BD2+ - CON	0.191	0.065	0.063	0.319	2.927	0.004	0.046	0.203	0.079	0.049	0.357	2.576	0.010	0.021
NfL	SCZ+ - CON	0.244	0.120	0.010	0.479	2.045	0.042	0.051	0.487	0.141	0.211	0.764	3.453	6.60e-04	0.002
QAlb	ADHD - CON	-0.219	0.124	-0.462	0.023	-1.772	0.078	0.115	-0.189	0.127	-0.439	0.060	-1.489	0.138	0.186
QAlb*	AN - CON	N/A	N/A	N/A	N/A	N/A	N/A	N/A	N/A	N/A	N/A	N/A	N/A	N/A	N/A
QAlb	BD1 - CON	0.209	0.114	-0.014	0.432	1.839	0.067	0.088	0.234	0.116	0.006	0.462	2.008	0.046	0.076
QAlb	BD2+ - CON	0.030	0.109	-0.183	0.244	0.278	0.781	0.888	0.007	0.110	-0.209	0.223	0.061	0.951	0.971
QAlb	SCZ+ - CON	-0.245	0.153	-0.544	0.054	-1.607	0.109	0.119	-0.216	0.155	-0.521	0.089	-1.390	0.166	0.218
*QAlb was not measured in AN

## Sheet: Table S4
Table S4. Variance explained (R2) for each drug adjusted for age, sex, diagnostic group and the non-disease covariance reference
Protein	Antiepileptics	Antidepressants	Central stimulants	First-generation antipsychotics	Lithium	Second-generation antipsychotics
1433Z	0.000407	0.002	0.002	0.000882	0.002	1.14e-06
QAlb	0.002	0.00093	0.00046	9.17e-05	0.007	0.000239
AP2B1	1.04e-07	0.000591	3.01e-06	0.000297	0.002	3.61e-05
APP	0.000422	0.000245	3.71e-05	0.003	0.002	0.004
C1q	0.000679	0.002	0.007	0.000526	0.002	0.000187
C2	0.001	0.000419	0.002	0.005	0.004	0.001
C3	0.00042	0.000522	0.000296	0.00054	0.007	0.000671
C3b/iC3b	0.001	0.004	0.003	0.000696	0.000958	6.63e-05
C4	5.09e-05	0.008	0.005	0.004	0.001	0.001
C4b	0.002	0.004	0.000166	9.93e-05	0.011	1.48e-05
C5	0.000109	0.002	0.000401	0.002	0.004	0.003
C5a	0.000516	0.002	0.000299	0.005	6.24e-05	9.03e-06
CFH	0.000153	0.000356	0.002	0.000474	0.004	0.001
CFI	0.000127	6.81e-06	0.000166	0.003	0.003	0.002
CNTN1	2.01e-06	0.0004	0.003	2.54e-05	1.7e-05	0.003
CNTN2	0.003	0.000759	3.65e-06	0.002	0.011	0.002
CPLX1	0.007	0.001	0.000939	0.002	0.037	6e-05
CPLX2	0.006	0.000966	0.002	0.002	0.038	0.000494
CSTN1	0.0002	0.003	4.42e-05	0.000204	0.005	0.003
CSTN3	0.000491	8.02e-06	0.004	0.000812	0.011	0.008
CTSD	4.22e-06	0.002	2.21e-05	3.76e-05	0.009	0.000149
GDIA	0.000102	0.017	0.000777	0.002	1.76e-05	0.000181
GRIA4	0.001	0.002	4.47e-05	0.01	0.000267	0.009
KCC2A	2.12e-05	0.002	0.002	0.002	3.14e-05	1.06e-05
LAMP1	0.00013	0.000152	0.000342	8.05e-07	0.000101	0.000298
MBL	0.000321	7.25e-05	0.000454	0.002	0.001	0.000413
NCAM2	9.88e-06	5.2e-09	0.002	0.004	0.003	0.011
NEUG	0.000217	7.01e-05	0.000438	0.001	7.08e-05	0.001
NfL	0.003	2.9e-05	0.002	1.38e-05	0.001	0.006
NLGN1	0.012	0.004	0.000484	0.000604	1.91e-06	0.000465
NLGN2	0.007	0.007	0.000644	6.81e-05	2.38e-05	7.84e-05
NLGN3	0.000619	0.003	0.000218	0.002	0.000611	0.000192
NLGNX	0.003	0.001	0.000493	8.92e-05	0.000108	7.18e-05
NPTX1	0.00028	0.000472	0.000921	6.89e-05	1.16e-06	0.005
NPTX2	0.001	0.001	1.17e-06	0.003	0.009	0.002
NPTXR	0.004	0.00042	0.000117	0.006	0.009	5.92e-05
NRX1A	0.004	0.002	0.000401	0.002	0.002	0.003
NRX2A	0.006	0.007	0.000282	0.002	0.000859	0.00031
NRX3A	0.000899	0.000477	0.001	0.004	0.002	0.002
NSF	0.006	0.000814	0.000213	0.00091	0.02	0.000602
SCG2	0.002	0.006	0.000578	0.000251	0.031	0.005
SNAP25	6.73e-06	0.000689	8.04e-07	7.11e-06	0.001	0.000765
STX1B	0.005	0.001	0.000337	2.72e-06	0.021	2.29e-05
STX7	0.000593	0.013	9.63e-05	0.007	0.000101	0.002
SYN1	0.000908	2.97e-06	0.001	0.000126	0.016	0.000835
SYT1	0.004	0.000218	0.000207	5.38e-05	0.000455	2.31e-05
SYUB	0.000333	0.01	0.000951	8.1e-05	0.004	0.005
THY1	0.007	0.002	0.001	0.000271	0.000573	0.000446
VAMP2	0.028	0.00064	0.003	0.001	0.022	0.000382
VGF	6.7e-05	0.012	0.000482	2.58e-05	0.008	0.009

## Sheet: Table S5
								Unadjusted		Ajusted
Protein	Accession	Gene_metabrain	CHROM	POS (GRCh38)	rs ID	MetaBeta (metabrain)	MetaP (metabrain)	Std. beta	p-value	Std. beta	p-value
CNTN2	Q02246	ENSG00000184144.12	1	205071887	rs11240349	0.258	9.44e-22	0.243	0.001	0.353	1.3e-05
CPLX1	O14810	ENSG00000168993.15	4	726719	rs7438761	-0.183	2.48e-10	-0.209	0.01	-0.276	0.001
CPLX2	Q6PUV4	ENSG00000145920.15	5	175877679	rs12522368	0.162	3.22e-09	0.017	0.842	0.168	0.045
NPTX1	Q15818	ENSG00000171246.6	17	80475411	rs74003912	-0.221	1.4e-10	-0.163	0.059	-0.322	0.000225
NPTXR	O95502	ENSG00000221890.4	22	38834735	rs1076612	-0.268	7e-23	-0.15	0.083	-0.174	0.027
STX7	O15400	ENSG00000079950.14	6	132473636	rs9321345	0.252	5.39e-20	0.039	0.622	0.218	0.009
